# Supplementary material
Source: PubMed Central journal article supplement (PMC8702456)
Supplement: NIHMS1750990-supplement-1.pdf [file NIHMS1750990-supplement-1.pdf]

## Supplemental Figure S1

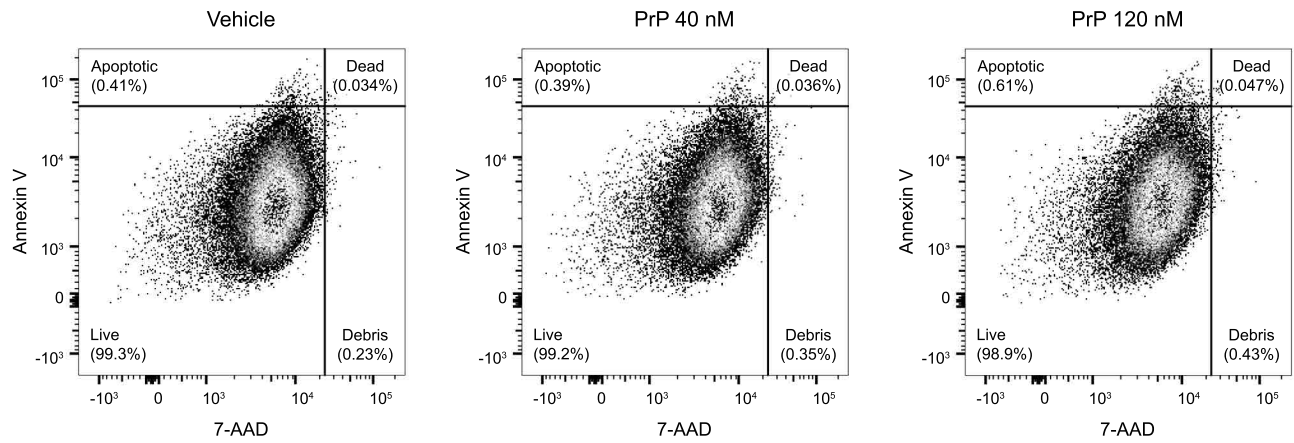

**Supplemental Figure S1.** S-PrP does not affect BMDM viability. BMDMs were treated with S-PrP (40 - 120 nM) or vehicle for 6 h. Representative flow cytometry analyses to detect apoptotic cells are shown. Apoptotic BMDMs were detected as cells that capture high levels of cell-surface Annexin V (y-axis, top of graph). 7-AAD uptake is shown on the x-axis. 7-AAD exclusion is a property of viable cells and also may be used to distinguish early apoptotic cells from late apoptotic or dead cells.

## Supplemental Figure S2

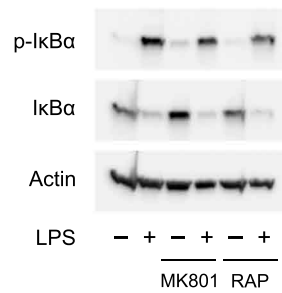

**Supplemental Figure S2.** MK801 and DXM do not affect the ability of LPS to induce IκBα phosphorylation in the absence of S-PrP. BMDMs were pre-treated with MK801 (1.0 μM), DXM (10 μM), or vehicle for 30 min, and then with LPS (0.1 μg/mL) for 1 h, as indicated. Immunoblot analysis was performed to detect phospho-IκBα, total IκBα, and β-actin.
